1 **Bioactive compounds from *Chrysosporium multifidum*, a**  
2 **fungus isolated from *Hermetia illucens* gut microbiota**

3

4

5 Yesenia Correa<sup>1</sup>, Billy Cabanillas<sup>1\*</sup>, Valérie Jullian<sup>2</sup>, Daniela Álvarez<sup>1</sup>, Denis Castillo<sup>1</sup>,  
6 Cédric Dufloer<sup>2</sup>, Beatriz Bustamante<sup>3</sup>, Elisa Roncal<sup>1</sup>, Edgar Neyra<sup>1</sup>, Patricia Sheen<sup>1</sup>,  
7 Michel Sauvain<sup>1,2</sup>

8

9

10 <sup>1</sup>Laboratorios de Investigación y Desarrollo, Facultad de Ciencias y Filosofía,  
11 Universidad Peruana Cayetano Heredia, Lima, Peru

12 <sup>2</sup>UMR 152 PharmaDev, Université de Toulouse, IRD, UPS, France

13 <sup>3</sup>Clinical Mycology Laboratory, Instituto de Medicina Tropical Alexander von  
14 Humboldt, Universidad Peruana Cayetano Heredia, Lima, Peru.

15

16 \* Corresponding autor

17 E-mail: [bjcabanillas@hotmail.com](mailto:bjcabanillas@hotmail.com)

18

19

20

## 21 **Abstract**

22 The gut microbiota of insects contains a wide range of organisms that protect them against  
23 the attack of pathogens by releasing various types of bioactive compounds. In the present  
24 study, we report the isolation and identification of the fungus *Chrysosporium multifidum*  
25 as a component of the microbiota from the larval gut of *Hermetia illucens*. Extract from  
26 the broth culture of *C. multifidum* showed moderate activity on a strain of methicillin-  
27 resistant *Staphylococcus aureus* (MRSA). The bioguided isolation of the extract resulted  
28 in the characterization of six  $\alpha$ -pyrone derivatives (**1-6**) and one diketopiperazines (**7**),  
29 among them 5,6-dihydro-4-methoxy-6-(1-oxopentyl)-2H-pyran-2-one (**4**) showed the  
30 best activity ( $IC_{50} = 11.4 \pm 0.7 \mu\text{g/ml}$  and  $MIC = 62.5 \mu\text{g/ml}$ ).

31

## 32 **Introduction**

33 *Hermetia illucens*, also known as the black soldier fly (BSF), is native species of  
34 Americas. In the last decade, interest in this insect has increased because its larvae can  
35 reduce various types of organic waste [1]. BSF larvae have the ability to extract efficiently  
36 the protein and lipid content of the wastes they feed on. The larvae and their derivatives  
37 appear as a promising alternative in sustainable production for the animal feed industry  
38 and biodiesel production. Several research groups and companies around the world are  
39 conducting studies in order to optimize their production on a large scale [2]. BSF larvae  
40 can feed on different types of organic waste unaffected by bacteria entering their gut [3,  
41 4]. The control of larvae over these pathogens would take place through the release of  
42 bioactive substances released into the larva [5]. Thus, compounds generated by BSF  
43 larvae could be an alternative to drugs used to treat bacteria harmful to humans, especially  
44 those that have shown increased antibiotic resistance in recent years [6, 7]. The gut

45 microbiota arises as an important source of antibacterial compounds due to the existing  
46 evidence on the different biological activities found in the fungi associated with insects  
47 [8-13]. Recently, a study showed the diversity of fungi isolated from the gut of BSF  
48 larvae. Among them, *Trichosporon asahii* showed to be active on sensitive strains of  
49 *Candida glabrata* and *Candida lusitaniae* [14]. Other antibacterial substances such as  
50 peptides [15, 16] and lipids [17] have also been isolated from BSF, but information is still  
51 limited. The purpose of this work is to describe the isolation and identification of a fungus  
52 with antimicrobial activity from the gut of BSF larvae, as well as the identification of  
53 isolated compounds from the *in vitro* culture of the fungus.

54

## 55 **Material and methods**

### 56 **Larvae rearing**

57 The BSF larvae used in this experiment were obtained from the breeding colony  
58 established at the Universidad Peruana Cayetano Heredia (Lima, Peru) maintained at 28  
59  $\pm 1^{\circ}\text{C}$  and 70% of relative humidity. Specimens were fed with fresh unsterilized chicken  
60 guano for 11 days. After this time larvae exhibited lengths between 1.5 - 2 cm.

61

### 62 **Extraction of gut from larvae and isolation of active fungi**

63 Samples were collected in triplicate; each collection corresponded to larvae obtained from  
64 a different breeding cycle. The larvae were washed with EtOH 70% and sterilized during  
65 15 min with UV light. Each larva was dissected transversally and the gut was extracted.  
66 A sample of 0.5 cm was taken from the middle gut to isolate the fungi. The gut samples  
67 were homogenized in 200  $\mu\text{l}$  of saline solution 0.89%. The resulting solutions were

68 diluted ( $10^{-1}$  -  $10^{-4}$ ) and 10  $\mu$ l were seeded in plates containing potato dextrose agar (PDA)  
69 (BD-Difco®) and Sabouraud agar (SBA) (BD-Difco®) both supplemented with  
70 chloramphenicol (100 mg/L) and gentamicin (50 mg/l). To confirm the absence of external  
71 contamination two controls were used, a first control using the saline solution used in  
72 homogenization, and a second control resulting from the swabbing of the larvae surface  
73 after disinfection and before dissection. Plates with sample dilutions were incubated for  
74 21 days at  $30 \pm 1^{\circ}\text{C}$ . Strains with different morphology were separated repeatedly and  
75 constantly in the same media to obtain pure colonies. The activity of fungi colonies to  
76 *Staphylococcus aureus* subsp. *aureus* ATCC 43300 and *Salmonella enterica* subsp.  
77 *enterica* var. Typhimurium ATCC 13311 were determinate by a previously described  
78 method [18], with small modifications. From all the 25 isolates obtained, one of them  
79 showed the best activity being submitted to DNA analysis to establish its identity at the  
80 specie level.

81

## 82 **DNA extraction from the active fungus**

83 A sample of 100 mg of mycelium was transferred into a 2 ml tube and 700  $\mu$ l of extraction  
84 buffer consisting of 0.1 M Tris-HCl (pH=8) , 20 mM EDTA (pH=8), 1.4 M NaCl, 0.2%  
85 (v/v) 2-mercaptoethanol and 2% (w/v) CTAB was added with mixed acid-washed 150-  
86 212  $\mu$ m glass beads. The mixture was placed inside a Quiagen Tissue Lyser II for 30  
87 seconds, and aliquot of 15  $\mu$ l RNAsa A (20 mg/ml) was added and then mixed at  $55^{\circ}\text{C}$   
88 and 850 rpm for 30 min. After, 700  $\mu$ l of chloroform:isoamyl alcohol (24:1) was added,  
89 and the mixture was centrifuged at 14,000 rpm for 10 min at room temperature. The  
90 supernatant was mixed with 50  $\mu$ l of 10% (w/v) CTAB and 600  $\mu$ l of chloroform and then  
91 centrifuged at 14,000 rpm for 10 min. The new supernatant was transferred to a clean 1.5

92 ml tube an equal volume of ice-cold was added, leaved at -20°C for one night, and then  
93 centrifuged at 14,000 rpm for 20 min. The pellet was washed with 1 ml of 80% ethanol  
94 (4°C) and centrifuged at 14,000 rpm for 10 min, the operation was repeated and the  
95 resulting pellet was left to dry at room temperature for 3 hours. The quantification of  
96 DNA was carried out by Nanodrop. Finally, an electrophoresis was performed to verify  
97 the integrity of the DNA in 1.5% agarose gel. The extracted DNA was stored at -20°C  
98 until use.

99

## 100 **PCR amplification and sequencing of the active fungus DNA**

101 A fungal DNA amplification was performed by conventional PCR, two zones were  
102 chosen for the amplification, the first one amplified an area covering ITS1-2 rRNA with  
103 the universal primers ITS1 (TCCGTAGGTGAACCTGCGGG) and ITS4  
104 (TCCTCCGCTTATTGATGGC); while the second covered D1/D2 domains of large sub-  
105 unit (LSU) ribosomal DNA(rDNA) with the universal primers NL1  
106 (GCATCAATAAGCGGGAGGAAAG) and NL4 (GGTCCGTGTTTCAAGGGG. A  
107 master mix solution was prepared containing 25 µl of KOD (Hot start Master Mix- Sigma  
108 Aldrich), 1.5 µl of each primer and 18.5 µl of NFW. The DNA was included in 3.5 µl at  
109 a concentration of 20 ng/µl. Cycling conditions were as follow: initial denaturation at  
110 94°C for 5 min, followed by 35 denaturation cycles at 94°C for 30 seconds, hybridization  
111 at 55.7°C for 30 seconds (for ITS1-2 zone amplification) or 58.1°C for 30 seconds (for  
112 D1/D2 region amplification), and extension at 72°C for 60 seconds, then a final extension  
113 was performed at 72°C for 7 min. The PCR product was verified by performing an 1.5 %  
114 agarose gel electrophoresis. The sequencing process was achieved by Macrogen USA,  
115 with an automated system based on Sanger's methodology. The sequences of each

116 amplified zone were analysed using Sequencher 5.4.6 Software (Gen Codes Corporation).  
117 Subsequently, Nucleotide BLAST tool (NCBI) was used to obtain the species with the  
118 highest homology between the sequences.

119

## 120 **Preparation of the *C. multifidum* broth extract**

121 A culture of *C. multifidum* ( $1 \times 10^5$  spores/ml) was inoculated into 50 ml of Sabouraud  
122 broth (BD-Difco®) and incubated at 30°C and 150 rpm for 2 days. The resulting culture  
123 was divided into two parts and transferred to a flask containing 500 ml of dextrose broth  
124 and incubated for 3 days at 30°C and 150 rpm. This operation was repeated until obtain  
125 10 L of culture. The broth was separated by vacuum filtration and extracted with ethyl  
126 acetate (v/v, 1:1). The organic layers were collected and the solvent removed in a  
127 rotavapor resulting in 1.5 g of crude extract.

128

## 129 **Compound isolation**

130 The crude extract (1.5 g) was chromatographed on silica gel by MPLC with a gradient of  
131  $\text{CH}_2\text{Cl}_2$ -MeOH (v/v 0:1 to 1:0 v/v) to give 6 fractions (CM1-CM16). Fraction 5 showed  
132 the best activity on the bioautography test [19]. It was rechromatographed using silica gel  
133 and a gradient of petroleum ether-ethyl acetate (v/v, 90:10 to 80:20) giving as result 8  
134 fractions (CM5.1 – CM5.8), fraction CM5.3 was identify as **2** (6.4 mg), fraction CM 5.5  
135 as **4** (1.7 mg) and fraction CM 5.8 as **6** (8 mg). Fraction CM5.7 was filtered on a Sephadex  
136 LH-20 column using  $\text{CH}_2\text{Cl}_2$  as eluent to yield **1** (4.2 mg). Compounds **3** (16.3 mg) and  
137 **5** (4.9 mg) were obtained from the purification of fraction CM9 on silica gel using a  
138 gradient of petroleum ether-ethyl acetate (v/v, 80:20 a 60:40). A fractionation of CM10

139 with a solvent system of MeOH-CH<sub>2</sub>Cl<sub>2</sub> (v/v, 80:20 to 100:0) resulted in the isolation of  
140 7 (5 mg).

141

## 142 **Antibacterial activity assays**

143 The half-maximal inhibitory concentration (IC<sub>50</sub>) was determinate using a microdilution  
144 method [20, 21]. Bacteria strains were cultured in 7 ml of Mueller Hinton Broth (MHB)  
145 incubated at 37°C for 24 hours. The tested compounds were dissolved in DMSO, final  
146 concentration of solvent was less 1%. Dilutions were prepared in 96 well plates mixing  
147 prepared DMSO solutions with MHB medium to a final volume of 50 µl. Then, a bacteria  
148 culture aliquot of 50 µl was inoculated to the dilutions. Final concentrations of  
149 compounds in each well ranged from 500 to 0.98 µg/ml and bacteria density was 5 x 10<sup>5</sup>  
150 CFU/ml. After 24 h of incubation at 37°C the optical density (OD) was read at 595 nm.  
151 Tetracycline was used as a positive control in a range of 0.3-0.025 µg/ml. A Probit  
152 analysis was performed to determine the IC<sub>50</sub> of the compounds. The minimum inhibitory  
153 concentration (MIC) is determined by observing the first concentration that did not  
154 present turbidity or bacterial growth.

155

## 156 **Results and discussions**

### 157 **Isolation and identification of the active fungus**

158 The culture of solutions prepared from *H. illucens* gut yielded to the isolation of 25  
159 cultivable fungal strains with different morphotypes. The active fungus was identified as  
160 *Arthroderma multifidum* with 100% identity and coverage with the AB861747.1 and  
161 AB359438.1. This specie is known as the sexual stage (teleomorph) of *Chrysosporium*

162 *multifidum* (anamorph) [22, 23]. No teleomorph stage was show in the prepared cultures,  
163 in contrast it presented abundant pyriform microconidia and hyaline septate hyphae (Fig  
164 1) belonging to its anamorph (*Chrysosporium multifidum*), so we finally named it as *C.*  
165 *multifidum* (GenBank accesion numbers: MK982149 and MK982181). The use of this  
166 stage allowed us to determine the antimicrobial activity of its culture supernatant with  
167 different experimental methods.

168 **Fig 1.** *Chrysosporium multifidum* isolated from *H. illucens* gut after 7 days of incubation  
169 at 30°C. Macroscopic view (A). Microscopic view of pyriform microconidia and hyaline  
170 septate hyphae (B).

171 This specie is a saprotroph commonly found in the soil. It has not been studied as an  
172 endosymbiont however it is seen as opportunistic and in other cases as a pathogen. Its  
173 isolation is directly related to the food consumed, since there are reports that indicate the  
174 isolation of the genus *Chrysosporium* from chicken guano samples [24]. This fact  
175 increases the probability that they are organisms assimilated along with food (chicken  
176 guano diet) and that they would be selected within the fly's biological system for their  
177 convenience (for having enzymes or even beneficial antimicrobial substances) in  
178 exchange for providing an environment with enough nutrients for their development  
179 [25]. It is known that even some of these selected fungi can survive in glandular cavities  
180 or cuticular invaginations called micangias where they can develop and reproduce being  
181 favourably transported to new hosts by the insects [26, 27].

182

### 183 **Compound isolation from *C. multifidum* broth extract**

184 The bioguided isolation of ethyl acetate extract prepared from the *C. multifidum* broth  
185 resulted in the isolation of: 4-methoxy-2H-pyran-2-one (1) [28], 4-methoxy-6-pentyl-2H-



186 pyran-2-one (**2**)[29], 6-(1-hydroxypentyl)-4-methoxy-pyran-2-one (**3**) [29, 30], 6-  
187 [(7S,8R)-8-propyloxiran-1-yl]-4-methoxy-pyran-2-one (**4**) [31], pestalotin (**5**) [32, 33],  
188 5,6-dihydro-4-methoxy-6-(pentanoyloxy)-2H-pyran-2-one (**6**) [30, 33] y cyclo-(L-Pro-L-  
189 Phe) (**7**) [34]. All the compounds (Fig 2) were identified by comparison of their  
190 spectroscopic data (HRMS and <sup>1</sup>H and <sup>13</sup>C NMR) with literature, as well as careful  
191 examination of their 2D NMR spectra (COSY, HSQC, HMBC). Optical rotations were  
192 also coherent with those published, except for (**4**), for which we found an optical rotation  
193 close to zero indicating the possible isolation of a racemic mixture (found  $[\alpha]^{20}_D$  -4.3,  
194  $c=0.16$ , MeOH/CH<sub>2</sub>Cl<sub>2</sub> 9/1 ; published  $[\alpha]^{25}_D$  -98.7,  $c=0.6$ , MeOH) [31].

195 **Fig 2.** Structure compounds of **1-7** isolated from *C. multifidum* broth extract

196 This study is the first published chemical characterization of *Chrysosporium multifidum*.  
197 The literature describes several chemical prospecting works carried out on species of the  
198 *Chrysosporium* genus, which led to the discovery of groups of compounds such as:  
199 adenopectines [35], nucleosides [36], zearalenone derivatives, benzoquinones [38],  
200 naphthaquinones [39], anthraquinones [40], benzolactones [41], naphthopyrones [42],  
201 naphthalenes [43], phenyl-2(1H)-pyridinones [44], alkylphenols [45],  
202 bisdechlorogeodins [46], sterols [47, 48], and caryophyllenes [49]. However, there is no  
203 prior record of any  $\alpha$ -pyrones derivatives, so this would be the first report of these  
204 compounds within the genus. Compound **8** is also reported here for the first time within  
205 the *Chrysosporium* genus; but this has also been reported from cultures of other fungi and  
206 bacteria [50, 51].

207

208 **Biological analyses**

209 The  $\alpha$ -pyrone **4** showed to be the more active in the bioautography test. Then  
210 antimicrobial activity was quantified, results are shown in Table 1. The values of IC<sub>50</sub>  
211 ( $11.4 \pm 0.7 \mu\text{g/ml}$ ) and MIC ( $62.5 \mu\text{g/ml}$ ) on the methicillin-resistant *Staphylococcus*  
212 *aureus* strain indicate only moderate activity compared to control. The known compounds  
213 in *Chrysosporium* genus have displayed biological activities as antitumour [44], antifungal  
214 (36, 37, 48, 49) and cytotoxic [41], only naphthaquinon-type compounds isolated from  
215 *C. queenslandicum* [39] have been shown to be active on gram-positive bacteria  
216 *Micrococcus luteus* and *Bacillus subtilis* with MIC values close to those obtained in this  
217 work. On the other hand, both natural and synthetic  $\alpha$ -pyrones have shown antimicrobial  
218 and antifungal activity on a variety of species [52, 53]. Substitutions in positions 4 and 6  
219 of the pyrone ring would be related to this activity. Subsequent trials should be carried  
220 out to test the activity of all derivatives of isolated  $\alpha$ -pyrones on other groups of bacteria  
221 including gram-negative ones.

222 **Table 1.** Antimicrobial activity of compound **4** against MRSA strain

223

## 224 **Conclusion**

225 A total of 25 fungi colonies were isolated from the gut of *Hermetia illucens* larvae fed  
226 with chicken guano. These colonies were tested on methicillin-resistant *Staphylococcus*  
227 *aureus* (MRSA) ATCC 43300 and *Salmonella* Typhimurium ATCC 13311. One colony  
228 showed the best activity on the MRSA strain, this specimen was subsequently identified  
229 as *Chrysosporium multifidum*. A broth culture of the fungus was prepared and seven  
230 compounds were isolated using chromatographic methods and bioassay by  
231 bioautography. The active compound against MRSA was identified as the  $\alpha$ -pyrone **4**  
232 with a MIC of  $62.5 \mu\text{g/ml}$ . These first results in the exploration of the microbiota of *H.*

233 *illucens* open a path to understand the interaction of this fungus with other  
234 microorganisms that allow the larva to control the pathogenic microbes introduced  
235 through its food made of contaminated organic waste.

## 236 **Author Contributions**

237 **Conceptualization:** Michel Sauvain, Yesenia Correa, Denis Castillo.

238 **Investigation:** Yesenia Correa, Billy Cabanillas, Valérie Jullian, Daniela Álvarez, Denis  
239 Castillo, Cédric Dufloer, Beatriz Bustamante, , Michel Sauvain.

240 **Funding acquisition:** Michel Sauvain.

241 **Methodology:** Elisa Roncal, Edgar Neyra, Patricia Sheen, Cédric Dufloer

242 **Supervision:** Billy Cabanillas, Michel Sauvain, Yesenia Correa, Valérie Jullian.

243 **Validation:** Billy Cabanillas, Michel Sauvain, Yesenia Correa, Valérie Jullian.

244 **Writing - original draft:** Billy Cabanillas, Yessenia Correa, Michel Sauvain, Daniela  
245 Alvarez.

246 **Writing - review & editing:** Billy Cabanillas, Yessenia Correa, Michel Sauvain, Daniela  
247 Alvarez

248

## 249 **References**

250 1. Wang YS, Shelomi M. Review of Black Soldier Fly (*Hermetia illucens*) as animal  
251 feed and human food. Foods. 2017; 6(10):91. doi: [10.3390/foods6100091](https://doi.org/10.3390/foods6100091).

- 252 2. Müller A, Wolf D, Gutzeit HO. The black soldier fly, *Hermetia illucens* – a  
253 promising source for sustainable production of proteins, lipids and bioactive  
254 substances. *Z Naturforsch C*. 2017; 72(9-10):351-363. doi: [10.1515/znc-2017-](https://doi.org/10.1515/znc-2017-0030)  
255 [0030](https://doi.org/10.1515/znc-2017-0030).
- 256 3. Jeon H, Park S, Choi J, Jeong G, Lee SB, Choi Y et al. The intestinal bacterial  
257 community in the food waste-reducing larvae of *Hermetia illucens*. *Curr*  
258 *Microbiol*. 2011; 62(5):1390-1399. doi: [10.1007/s00284-011-9874-8](https://doi.org/10.1007/s00284-011-9874-8).
- 259 4. Bruno D, Bonelli M, De Filippis F, Di Lelio I, Tettamanti G, Casartelli M, et al.  
260 The intestinal microbiota of *Hermetia illucens* larvae is affected by diet and shows  
261 a diverse composition in the different midgut regions. *Appl Environ Microbiol*.  
262 2019; 85 (2): e01864-18. doi: [10.1128/AEM.01864-18](https://doi.org/10.1128/AEM.01864-18).
- 263 5. Choi WH, Yun JH, Chu JP, Chu KB. Antibacterial effect of extracts of *Hermetia*  
264 *illucens* (Diptera: Stratiomyidae) larvae against Gram-negative bacteria. *Entomol*.  
265 *Res*. 2012; 42(5): 219–226. doi: [10.1111/j.1748-5967.2012.00465.x](https://doi.org/10.1111/j.1748-5967.2012.00465.x).
- 266 6. Tenover, FC. Mechanisms of antimicrobial resistance in bacteria. *Am J Infect*  
267 *Control* 2006; 34(5): S3-10. doi: [10.1016/j.ajic.2006.05.219](https://doi.org/10.1016/j.ajic.2006.05.219)
- 268 7. Mathur P, Singh S. Multidrug resistance in bacteria: a serious patient safety  
269 challenge for India. *J Lab Physicians*. 2011; 5(1):5-10. doi: [10.4103/0974-](https://doi.org/10.4103/0974-2727.115898)  
270 [2727.115898](https://doi.org/10.4103/0974-2727.115898).
- 271 8. Nilanonta C, Isaka M, Kittakoop P, Palittapongarnpim P, Kamchonwongpaisan  
272 S, Pittayakhajonwut D, et al.. Antimycobacterial and antiplasmodial  
273 cyclodepsipeptides from the insect pathogenic fungus *Paecilomyces tenuipes*  
274 BCC 161. *Planta Med* 2000; 66(8): 756-758. doi: [10.1055/s-2000-9776](https://doi.org/10.1055/s-2000-9776).
- 275 9. Gebhardt K, Schimana J, Krastel P, Dettner K, Rheinheimer J, Zeeck A, et al.  
276 Endophenazines A–D, newphenazine antibiotics from the arthropod associated

- 277 endosymbiont *Streptomyces anulatus*. I. Taxonomy, fermentation, isolation and  
278 biological activities. J. Antibiot. 2002; 55(9):794–800. doi:  
279 [10.7164/antibiotics.55.794](https://doi.org/10.7164/antibiotics.55.794).
- 280 10. Schlörke O, Krastel P, Müller I, Usón I, Dettner K, Zeeck A. Structure and  
281 biosynthesis of ceto-niacytone A, a cytotoxic aminocarba sugar produced by an  
282 endosymbiotic *Actinomyces*. J. Antibiot. 2002; 55(7):635–642. doi:  
283 [10.7164/antibiotics.55.635](https://doi.org/10.7164/antibiotics.55.635).
- 284 11. Isaka M, Rugseree N, Maithip P, Kongsaree P, Prabpai S, Thebtaranonth Y.  
285 Hirsutellones A–E, antimycobacterial alkaloids from the insect pathogenic fungus  
286 *Hirsutella nivea* BCC 2594. *Tetrahedron* 2005; 61(23):5577–5583. doi:  
287 [10.1016/j.tet.2005.03.099](https://doi.org/10.1016/j.tet.2005.03.099)
- 288 12. Oh, DC, Scott JJ, Currie CR, Clardy J. Mycangimycin, A polyene peroxide from  
289 a mutualist *Streptomyces* ssp. *Org. Lett.* 2009; 11(3):633–636. doi:  
290 [10.1021/ol802709x](https://doi.org/10.1021/ol802709x).
- 291 13. Carr G, Derbyshire ER, Caldera E, Currie CR, Clardy J. Antibiotic and  
292 antimalarial quinones from fungus-growing ant-associated *Pseudonocardia* sp. J.  
293 Nat. Prod. 2012 ; 75(10):1806–1809. doi: [10.1021/np300380t](https://doi.org/10.1021/np300380t).
- 294 14. Varotto Boccazzi I, Ottoboni M, Martin E, Comandatore F, Vallone L, Spranghers  
295 T, et al. A survey of the mycobiota associated with larvae of the black soldier fly  
296 (*Hermetia illucens*) reared for feed production. *PLoS One* 2017; 12(8):e0182533.  
297 doi: [10.1371/journal.pone.0182533](https://doi.org/10.1371/journal.pone.0182533).
- 298 15. Park SI, Kim JW, Yoe SM. Purification and characterization of a novel  
299 antibacterial peptide from black soldier fly (*Hermetia illucens*) larvae. *Dev Comp*  
300 *Immunol.* 2015; 52(1):98–106. doi: [10.1016/j.dci.2015.04.018](https://doi.org/10.1016/j.dci.2015.04.018).

- 301 16. Elhag O, Zhou D, Song Q, Soomro AA, Cai M, Zheng L, Yu Z, Zhang J.  
302 Screening, expression, purification and functional characterization of novel  
303 antimicrobial peptide genes from *Hermetia illucens* (L.). PloS one 2017, 12(1),  
304 e0169582. doi: [10.1371/journal.pone.0169582](https://doi.org/10.1371/journal.pone.0169582).
- 305 17. Won HC, Jiang. M. Evaluation of antibacterial activity of hexanedioic acid  
306 isolated from *Hermetia illucens* larvae. J Appl Biomed. 2014; 12(3):179-189. doi:  
307 [10.1016/j.jab.2014.01.003](https://doi.org/10.1016/j.jab.2014.01.003).
- 308 18. Pereira E, Santos A, Reis F, Tavares RM, Baptista P, Lino-Neto T, et al. A new  
309 effective assay to detect antimicrobial activity of filamentous fungi. Microbiol  
310 Res 2013; 168(1), 1-5. doi: [10.1016/j.micres.2012.06.008](https://doi.org/10.1016/j.micres.2012.06.008).
- 311 19. Rahalison L, Hamburger M, Hostettmann K, Monod M, Frenk E. A  
312 bioautographic agar overlay method for the detection of antifungal compounds  
313 from higher plants. Phytochem Analysis 1991; 2:199-203. doi:  
314 [10.1002/pca.2800020503](https://doi.org/10.1002/pca.2800020503).
- 315 20. Wiegand I, Hilpert K, Hancock RE. Agar and broth dilution methods to determine  
316 the minimal inhibitory concentration (MIC) of antimicrobial substances. Nat  
317 Protoc. 2008; 3(2):163. doi: [10.1038/nprot.2007.521](https://doi.org/10.1038/nprot.2007.521).
- 318 21. Zgoda JR, Porter JR. A Convenient Microdilution method for screening natural  
319 products against bacteria and fungi. Pharm Biol. 2001; 39(3):221-5. doi:  
320 [10.1076/phbi.39.3.221.5934](https://doi.org/10.1076/phbi.39.3.221.5934).
- 321 22. Chabasse D, Guiguen C, Couatarmanac'h A, Launay H, Reecht V, De Bièvre C.  
322 Contribution à la connaissance de la flore fongique kératinophile isolée des petits  
323 Mammifères sauvages et du lapin de garenne en France-Discussion sur les espèces  
324 fongiques rencontrées. Ann Parasit Hum Comp. 1987; 62(4):357-368. doi:  
325 [10.1051/parasite/1987624357](https://doi.org/10.1051/parasite/1987624357).

- 326 23. Metin B, Heitman J. Sexual reproduction in dermatophytes. *Mycopathologia*.  
327 2017; 182(1-2):45-55. doi: [10.1007/s11046-016-0072-x](https://doi.org/10.1007/s11046-016-0072-x).
- 328 24. Allimuthu V. Implication of fungal growth in poultry management and biogas  
329 production. PhD Thesis, Periyar University, 2015. Available from:  
330 <http://hdl.handle.net/10603/151954>.
- 331 25. Moubasher AH, Abdel-Sater MA, Soliman Z. Yeasts and filamentous fungi  
332 inhabiting guts of three insect species in Assiut, Egypt. *Mycosphere* 2017;  
333 8(9):1297-316. doi: [10.5943/mycosphere/8/9/4](https://doi.org/10.5943/mycosphere/8/9/4).
- 334 26. Beaver R, Wilding N, Collins N, Hammond P, Webber J. Insect-fungus  
335 relationships in the bark and ambrosia beetles. *Insect-fungus interactions*.  
336 1989:121-43. doi: [10.1016/B978-0-12-751800-8.50011-2](https://doi.org/10.1016/B978-0-12-751800-8.50011-2).
- 337 27. Stone W, Nebeker T, Monroe W. Ultrastructure of the mesonotal mycangium of  
338 *Xylosandrus mutilatus* (Blandford), an exotic ambrosia beetle (Coleoptera:  
339 Curculionidae: Scolytinae) by light, scanning, and transmission electron  
340 microscopy. *Microsc Microanal* 2005; 11(S02):172-173. doi:  
341 [10.1017/S143192760550015](https://doi.org/10.1017/S143192760550015).
- 342 28. Rao KB, Reddy GCS. A new reaction of patulin. *J. Nat. Prod.* 1989, 52(6):1376–  
343 1378. doi: [10.1021/np50066a039](https://doi.org/10.1021/np50066a039).
- 344 29. Evidente A, Zonno MC, Andolfi A, Troise C, Cimmino A, Vurro M. Phytotoxic  
345  $\alpha$ -pyrones produced by *Pestalotiopsis guepinii*, the causal agent of hazelnut twig  
346 blight. *The Journal of antibiotics* 2012; 65, 203-206. doi: [10.1038/ja.2011.134](https://doi.org/10.1038/ja.2011.134).
- 347 30. Strunz GM, Heissne, CJ, Kakushima M, Stillwell MA. Metabolites of an  
348 unidentified Fungus: a new 5,6-dihydro-2-pyrone related to pestalotin. *Can J*  
349 *Chem.* 1974, 52(5): 825-826. doi: [10.1139/v74-128](https://doi.org/10.1139/v74-128).

- 350 31. Yang XL, Huang L, Li HY., Yang DF, Li ZZ. Two new compounds from the plant  
351 endophytic fungus *Pestalotiopsis versicolor*. J Asian Nat Prod Res. 2014; 17(4):  
352 333-337. doi: [10.1080/10286020.2014.961918](https://doi.org/10.1080/10286020.2014.961918).
- 353 32. Ellestad GA, McGahren WJ, Kunstmann MP. Structure of a new fungal lactone,  
354 LL-P880.alpha., from an unidentified *Penicillium* species. J Org Chem. 1972;  
355 37(12):2045-2047. doi: [10.1021/jo00977a044](https://doi.org/10.1021/jo00977a044).
- 356 33. Kimura Y, Susuki A, Tamura S. <sup>13</sup>C-NMR Spectra of pestalotin and its  
357 analogues. Agr Biol Chem, 1980; 44(2): 451-452. doi:  
358 [10.1080/00021369.1980.10863966](https://doi.org/10.1080/00021369.1980.10863966).
- 359 34. Sansinenea E, Salazar F, Jiménez J, Mendoza A, Ortiz A. Diketopiperazines  
360 derivatives isolated from *Bacillus thuringiensis* and *Bacillus endophyticus*,  
361 establishment of their configuration by X-ray and their synthesis. Tetrahedron  
362 Lett. 2016, 57(24), 2604–2607. doi: [10.1016/j.tetlet.2016.04.117](https://doi.org/10.1016/j.tetlet.2016.04.117).
- 363 35. Hayakawa Y, Adachi H, Kim JW, Shin-ya K, Seto H. Adenopeptin, a new  
364 apoptosis inducer in transformed cells from *Chrysosporium* sp. Tetrahedron 1998;  
365 54(52):15871-15878. doi: [10.1016/S0040-4020\(98\)00996-X](https://doi.org/10.1016/S0040-4020(98)00996-X).
- 366 36. Yamashita M, Kawai Y, Uchida I, Komori T, Kohsaka M, Imanaka H, et al.  
367 Chryscandin, a novel peptidyl nucleoside antibiotic. II. Structure determination  
368 and synthesis. J Antibiot. 1984; 37(11):1284-1293. doi:  
369 [10.7164/antibiotics.37.1284](https://doi.org/10.7164/antibiotics.37.1284).
- 370 37. Hoshino Y, Ivanova VB, Yazawa K, Ando A, Mikami Y, Zaki SM, et al.  
371 Queenslandon, a new antifungal compound produced by *Chrysosporium*  
372 *queenslandicum*: production, isolation and structure elucidation. J Antibiot. 2002;  
373 55(5):516-519. doi: [10.7164/antibiotics.55.516](https://doi.org/10.7164/antibiotics.55.516).



- 374 38. Fredenhagen A, Petersen F, Tintelnot-Blomley M, Rösel J, Mett H, Hug P.  
375 Semicochliodinol A and B: inhibitors of HIV-1 protease and EGF-R protein  
376 tyrosine kinase related to asterriquinones produced by the fungus *Chrysosporium*  
377 *meridarium*. J. Antibiot. 1997; 50(5):395-401. doi: [10.7164/antibiotics.50.395](https://doi.org/10.7164/antibiotics.50.395).
- 378 39. Ivanova VB, Hoshino Y, Yazawa K, Ando A, Mikami Y, Zaki SM, et al. Isolation  
379 and structure elucidation of two new antibacterial compounds produced by  
380 *Chrysosporium queenslandicum*. J Antibiot. 2002; 55(10):914-918. doi:  
381 [10.7164/antibiotics.55.914](https://doi.org/10.7164/antibiotics.55.914).
- 382 40. Slater GP, Haskins RH, Hogge LR. Metabolites from a *Chrysosporium* species.  
383 Can J Microbiol. 1971; 17(12): 1576-1579. doi: [10.1139/m71-252](https://doi.org/10.1139/m71-252).
- 384 41. Jeon, JE, Julianti E, Oh H, Park W, Oh DC, Oh KB, et al. Stereochemistry of  
385 hydroxy-bearing benzolactones: isolation and structural determination of  
386 chrysoarticulins A–C from a marine-derived fungus *Chrysosporium articulatum*.  
387 Tetrahedron Lett. 2013; 54(24):3111–3115. doi: [10.1016/j.tetlet.2013.04.006](https://doi.org/10.1016/j.tetlet.2013.04.006).
- 388 42. Ogawa H, Hasumi K, Sakai K, Murakawa S, Endo A. Pannorin, a new 3-hydroxy-  
389 3-methylglutaryl coenzyme A reductase inhibitor produced by *Chrysosporium*  
390 *pannorum*. J Antibiot 1991; 44(7):762-767. doi: [10.7164/antibiotics.44.762](https://doi.org/10.7164/antibiotics.44.762).
- 391 43. Tsipouras A, Goetz MA, Hensens OD, Liesch JM, Ostlind DA, Williamson JM,  
392 et al. Sporandol: a novel antiparasitic binaphthalene from *Chrysosporium*  
393 *meridarium*. Bioorg Med Chem Lett. 1997; 7(10):1279–1282. doi:  
394 [10.1016/S0960-894X\(97\)00226-6](https://doi.org/10.1016/S0960-894X(97)00226-6).
- 395 44. Hirano N, Kohno J, Tsunoda S, Nishio M, Kishi N, Okuda T, et al. TMC-69, a  
396 new Antitumor antibiotic with Cdc25A inhibitory activity, produced by  
397 *Chrysosporium* sp. TCI068. J Antibiot 2001, 54(5): 421-427. doi:  
398 [10.7164/antibiotics.54.421](https://doi.org/10.7164/antibiotics.54.421).

- 399 45. Sekhar Rao KC, Divaka S, Karanth NG, Sattur AP. 14-(2',3',5'-  
400 trihydroxyphenyl)tetradecan-2-ol, a novel acetylcholinesterase inhibitor from  
401 *Chrysosporium* sp. J. Antibiot. 2001; 54(10):848-849. doi:  
402 [10.7164/antibiotics.54.848](https://doi.org/10.7164/antibiotics.54.848).
- 403 46. Tanaka Y, Matsuzaki K, Zhong CL, Yoshida H, Kawakubo T, Masuma R, et al.  
404 Dechlorogeodin and its new dihydro derivatives, fungal metabolites with  
405 herbicidal activity. J Antibiot. 1996; 49(10):1056-9. doi:  
406 [10.7164/antibiotics.49.1056](https://doi.org/10.7164/antibiotics.49.1056).
- 407 47. Van der Pyl D, Cans P, Debernard JJ, Herman F, Lelievre Y, Tahraoui L, et al.  
408 RPR113228, a novel farnesyl protein transferase inhibitor produced by  
409 *Chrysosporium lobatum*. J Antibiot. 1995; 48(7):736-737. doi:  
410 [10.7164/antibiotics.48.736](https://doi.org/10.7164/antibiotics.48.736).
- 411 48. Yang SW, Buevich A, Chan TM, Terracciano J, Chen G, Loebenberg D, et al. A  
412 new antifungal sterol sulfate, Sch 601324, from *Chrysosporium* sp. J Antibiot.  
413 2003; 56(4):419-422. doi: [10.7164/antibiotics.56.419](https://doi.org/10.7164/antibiotics.56.419).
- 414 49. Yang SW, Chan TM, Terracciano J, Boehm E, Patel R, Chen G, et al.  
415 Caryophyllenes from a fungal culture of *Chrysosporium pilosum*. J Nat Prod.  
416 2009; 72(3):484-487. doi: [10.1021/np8006414](https://doi.org/10.1021/np8006414).
- 417 50. Chen YS. Studies on the metabolic products of *Rosellinia necatrix*. I. Isolation  
418 and characterization of several physiologically active neutral substances. Bull.  
419 Agr. Chem. Soc. Japan 1960, 24 (4):372-381. doi:  
420 [10.1080/03758397.1960.10857680](https://doi.org/10.1080/03758397.1960.10857680).
- 421 51. Takeda Y, Fujita T, Shingu T, Ogimi C. Studies on the bacterial gall of *Myrica*  
422 *rubra*: isolation of a new [7.0]-Metacyclophan from the gall and dl- $\beta$ -phenyllactic

- 423 acid from the culture of gall-forming bacteria. Chem Pharm Bull. 1987; 35:2569–  
424 73. doi: [10.1248/cpb.35.2569](https://doi.org/10.1248/cpb.35.2569).
- 425 52. Fairlamb IJ, Marrison LR, Dickinson JM, Lu FJ, Schmidt JP. 2-pyrone  
426 possessing antimicrobial and cytotoxic activities. Bioorg Med Chem. 2004;  
427 12(15):4285-4299. doi: [10.1016/j.bmc.2004.01.051](https://doi.org/10.1016/j.bmc.2004.01.051).
- 428 53. Bhat ZS, Rather MA, Maqbool M, Lah HU, Yousuf SK, Ahmad Z.  $\alpha$ -pyrones:  
429 Small molecules with versatile structural diversity reflected in multiple  
430 pharmacological activities-an update. Biomed Pharmacother. 2017; 91:265-277.  
431 doi: [10.1016/j.biopha.2017.04.012](https://doi.org/10.1016/j.biopha.2017.04.012).

432

433

434

435 **Figure 1**

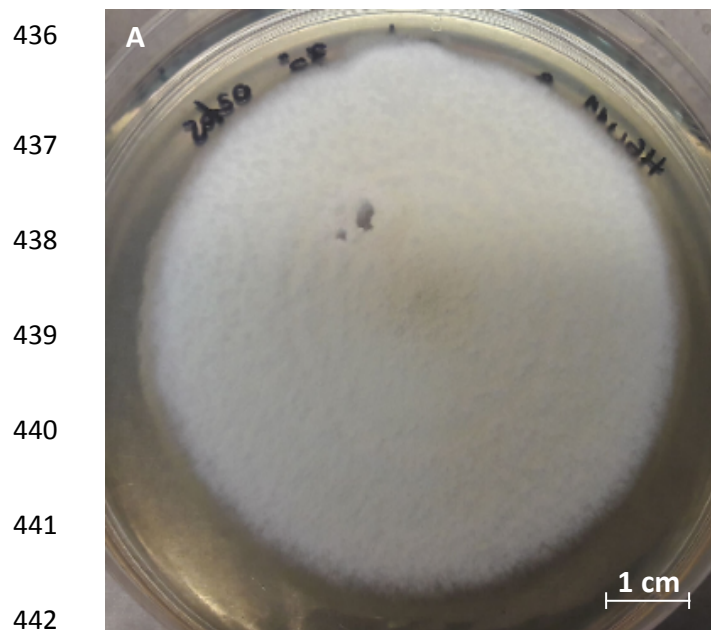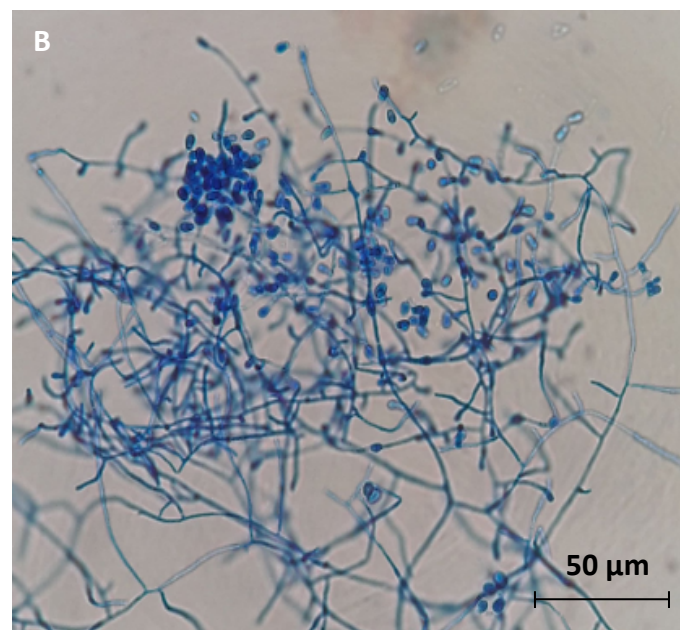

443

444

445

**Figure 2**

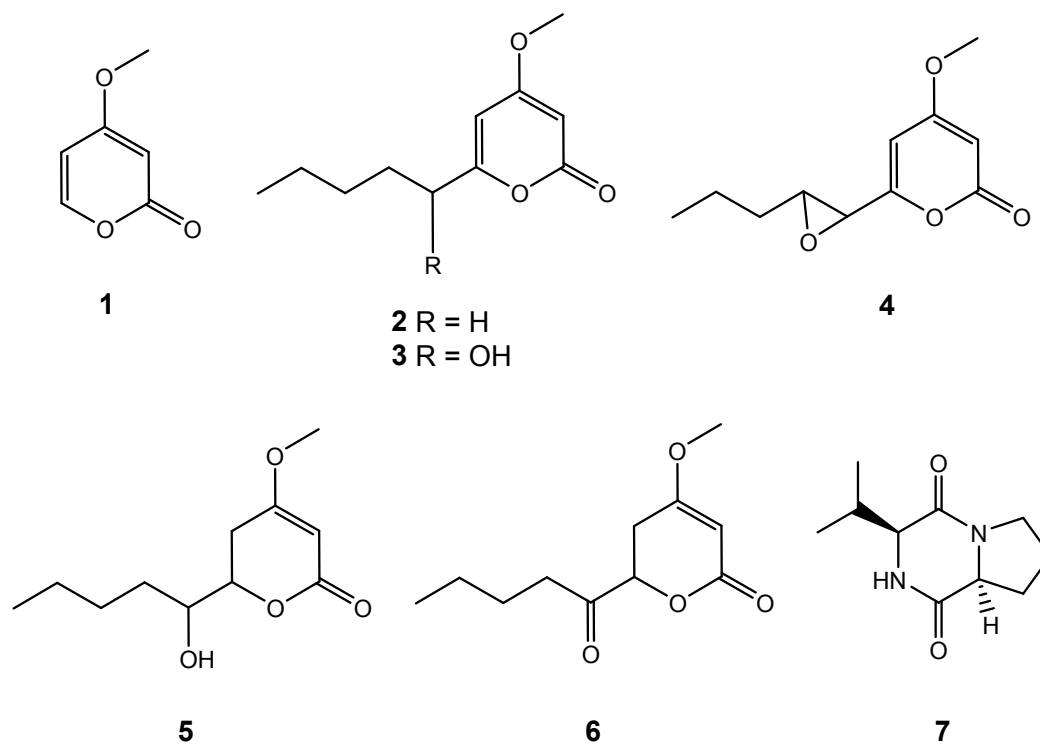

446

447

448

449

450

451

452

453

454

455

456

457

458 **TABLE 1**

| <b>Compound</b>     | <b>IC<sub>50</sub> (µg/mL)</b> | <b>MIC (µg/mL)</b> |
|---------------------|--------------------------------|--------------------|
| <b>4</b>            | 11.4 ± 0.7                     | 62.5               |
| <b>Tetracycline</b> | 0.1 ± 0.02                     | 0.4                |

459

460

461
